# Supplementary material for: Gastrointestinal Microbiota & Symptoms of Depression and Anxiety in Anorexia Nervosa—A Re-Analysis of the MICROBIAN Longitudinal Study
Source: MDPI journal article supplement (doi:10.3390/nu16060891), 2024-03-19
Supplement: s1 [file s1]

# Gastrointestinal Microbiota & Symptoms of Depression and Anxiety in Anorexia Nervosa – A Re-Analysis of the MICROBIAN Longitudinal Study

Jasmin Ketel <sup>1,2</sup>, Miquel Bosch-Bruguera <sup>1,2</sup>, Greta Auchter <sup>1,2</sup>, Ulrich Cuntz <sup>3,4</sup>, Stephan Zipfel <sup>1,2</sup>, Paul Enck <sup>1,2</sup> and Isabelle Mack <sup>1,2,\*</sup>

<sup>1</sup> Department of Psychosomatic Medicine and Psychotherapy, University Hospital Tübingen, 72076 Tübingen, Germany; jasmin.ketel@med.uni-tuebingen.de (J.K.); miquel.bosch-bruguera@med.uni-tuebingen.de (M.B.-B.); greta.schmidt@eloquens.de (G.A.); stephan.zipfel@med.uni-tuebingen.de (S.Z.); paul.enck@proton.me (P.E.)

<sup>2</sup> Centre of Excellence for Eating Disorders (KOMET), 72076 Tübingen, Germany

<sup>3</sup> Klinik Roseneck, Center for Behavioral Medicine, 83209 Prien am Chiemsee, Germany; ucuntz@schoen-kliniken.de

<sup>4</sup> Forschungsprogramm für Psychotherapieevaluation im Komplexen Therapiesetting, Paracelsus Medical University (PMU), 5020 Salzburg, Austria

\* Correspondence: isabelle.mack@uni-tuebingen.de

**Table S1.** Mann-Whitney U test for differences in alpha diversity measurements between groups with higher and lower symptom severity of anxiety, depression and eating disorder pathology and groups with higher and lower BMI before (T1) and after weight rehabilitation (T2).

| Psyche variables | Shannon index |       |       |       |     |       |      |       | Chao1 index |       |      |       |     |       |       |       | Inverse Simpson index |       |       |       |     |       |       |       | Gini Simpson index |       |       |       |     |       |       |       |
|------------------|---------------|-------|-------|-------|-----|-------|------|-------|-------------|-------|------|-------|-----|-------|-------|-------|-----------------------|-------|-------|-------|-----|-------|-------|-------|--------------------|-------|-------|-------|-----|-------|-------|-------|
|                  | T1            |       |       |       | T2  |       |      |       | T1          |       |      |       | T2  |       |       |       | T1                    |       |       |       | T2  |       |       |       | T1                 |       |       |       | T2  |       |       |       |
|                  | U             | Z     | p     | r     | U   | Z     | p    | r     | U           | Z     | p    | r     | U   | Z     | p     | r     | U                     | Z     | p     | r     | U   | Z     | p     | r     | U                  | Z     | p     | r     | U   | Z     | p     | r     |
| PHQ-9            | 327           | -1.96 | 0.398 | -0.11 | 174 | -1.3  | .193 | -0.2  | 307         | -1.18 | .238 | -0.16 | 172 | -1.35 | 0.178 | -0.2  | 338                   | -0.66 | 0.509 | -0.09 | 190 | -0.91 | 0.363 | -0.14 | 338                | -0.66 | 0.509 | -0.09 | 190 | -0.91 | 0.363 | -0.14 |
| BDI-II           | 244           | -0.64 | 0.519 | -0.09 | 142 | -1.93 | .054 | -0.29 | 243         | -0.66 | .508 | -0.09 | 144 | -1.87 | 0.061 | -0.28 | 245                   | -0.62 | 0.533 | -0.08 | 156 | -1.56 | 0.118 | -0.24 | 245                | -0.62 | 0.533 | -0.08 | 156 | -1.56 | 0.118 | -0.24 |
| BSI-D            | 311           | -2.1  | 0.836 | -0.03 | 216 | -0.49 | .622 | -0.07 | 252         | -1.28 | .202 | -0.17 | 247 | -.21  | 0.831 | -0.03 | 333                   | -0.17 | 0.864 | -0.02 | 198 | -0.92 | 0.359 | -0.14 | 333                | -0.17 | 0.864 | -0.02 | 198 | -0.92 | 0.359 | -0.14 |
| GAD-7            | 403           | -0.51 | 0.608 | -0.1  | 167 | -1.32 | .186 | -0.2  | 425         | -0.89 | .373 | -0.12 | 128 | -1.52 | 0.129 | -0.23 | 402                   | -0.5  | 0.619 | -0.07 | 181 | -0.97 | 0.33  | -0.15 | 402                | -0.5  | 0.619 | -0.07 | 181 | -0.97 | 0.33  | -0.15 |
| BSI-A            | 324           | -0.85 | 0.396 | -0.11 | 192 | -0.98 | .325 | -0.15 | 326         | -0.82 | .412 | -0.11 | 187 | -1.11 | 0.266 | -0.17 | 342                   | -0.55 | 0.586 | -0.07 | 197 | -0.86 | 0.388 | -0.13 | 342                | -0.55 | 0.586 | -0.07 | 197 | -0.86 | 0.388 | -0.13 |
| EDI-II           | 485           | -1.79 | 0.073 | -0.24 | 222 | -0.45 | .65  | -0.07 | 527         | -2.5  | .012 | -0.34 | 210 | -0.74 | 0.459 | -0.11 | 464                   | -1.44 | 0.151 | -0.19 | 200 | -0.97 | 0.334 | -0.15 | 464                | -1.44 | 0.151 | -0.19 | 200 | -0.97 | 0.334 | -0.15 |
| SIAB             | 381           | -0.04 | 0.966 | -0.01 | 198 | -1.01 | .312 | -0.15 | 436         | -0.97 | .333 | -0.13 | 222 | -0.44 | 0.663 | -0.07 | 449                   | -1.18 | 0.237 | -0.16 | 185 | -1.29 | 0.201 | -0.19 | 449                | -1.18 | 0.237 | -0.16 | 185 | -1.29 | 0.201 | -0.19 |
| BMI              | 313           | -1.09 | 0.278 | -0.15 | 282 | -0.93 | .354 | -0.14 | 333         | -0.74 | .459 | -0.1  | 250 | -0.18 | 0.86  | -0.03 | 310                   | -1.13 | 0.258 | -0.15 | 306 | -1.49 | 0.137 | -0.22 | 310                | -1.13 | 0.258 | -0.15 | 306 | -1.49 | 0.137 | -0.22 |

Grouping was based on median splits of the symptom severity and BMI scores. Patient Health Questionnaire 9 (PHQ-9), Beck Depression Inventory II (BDI-II), Brief Symptom Inventory scale 4 (BSI-D), **Generalized** Anxiety Disorder Questionnaire (GAD-7), Brief Symptom Inventory scale 5 (BSI-A), Eating Disorder Inventory (EDI-II), Structured Interview for Anorexic and Bulimic Eating Disorders (SIAB), Body Mass Index (BMI).

**Table S2.** Spearman correlations of symptoms for anxiety, depression, eating disorder pathology and BMI with alpha diversity indices before (T1) and after weight rehabilitation (T2).

| Psyche variables | Shannon index |          |            |          |          |            | Chao1 index |          |            |          |          |            | Inverse Simpson index |          |            |          |          |            | Gini Simpson index |          |            |          |          |            |
|------------------|---------------|----------|------------|----------|----------|------------|-------------|----------|------------|----------|----------|------------|-----------------------|----------|------------|----------|----------|------------|--------------------|----------|------------|----------|----------|------------|
|                  | T1            |          |            | T2       |          |            | T1          |          |            | T2       |          |            | T1                    |          |            | T2       |          |            | T1                 |          |            | T2       |          |            |
|                  | <i>S</i>      | <i>p</i> | <i>rho</i> | <i>S</i> | <i>p</i> | <i>rho</i> | <i>S</i>    | <i>p</i> | <i>rho</i> | <i>S</i> | <i>p</i> | <i>rho</i> | <i>S</i>              | <i>p</i> | <i>rho</i> | <i>S</i> | <i>p</i> | <i>rho</i> | <i>S</i>           | <i>p</i> | <i>rho</i> | <i>S</i> | <i>p</i> | <i>rho</i> |
| PHQ-9            | 27407         | 0.935    | 0.01       | 11111    | 0.302    | 0.16       | 26544       | 0.758    | 0.04       | 11836    | 0.5      | 0.12       | 27200                 | 0.892    | 0.02       | 9781     | 0.188    | 0.21       | 27200              | 0.892    | 0.02       | 9781     | 0.188    | 0.21       |
| BDI-II           | 16822         | 0.855    | 0.03       | 9386     | 0.127    | 0.24       | 16470       | 0.75     | 0.05       | 10380    | 0.31     | 0.16       | 16714                 | 0.822    | 0.03       | 9781     | 0.188    | 0.21       | 16714              | 0.822    | 0.03       | 9781     | 0.188    | 0.21       |
| BSI-D            | 27260         | 0.904    | 0.02       | 12532    | 0.45     | 0.17       | 24930       | 0.465    | 0.1        | 13829    | 0.87     | 0.03       | 28591                 | 0.82     | -0.03      | 12461    | 0.431    | 0.12       | 28591              | 0.820    | -0.03      | 12461    | 0.431    | 0.12       |
| GAD-7            | 25709         | 0.599    | 0.07       | 10009    | 0.114    | 0.24       | 26245       | 0.7      | 0.05       | 10401    | 0.17     | 0.21       | 25757                 | 0.607    | 0.07       | 10642    | 0.207    | 0.20       | 25757              | 0.607    | 0.07       | 10642    | 0.207    | 0.20       |
| BSI-A            | 23593         | 0.278    | 0.15       | 13029    | 0.597    | 0.08       | 23936       | 0.32     | 0.14       | 12046    | 0.33     | 0.15       | 24415                 | 0.386    | 0.12       | 13337    | 0.698    | 0.06       | 24415              | 0.386    | 0.12       | 13337    | 0.698    | 0.06       |
| EDI-II           | 35169         | 0.047    | -0.27      | 14535    | 0.876    | -0.02      | 35773       | -0.291   | -0.29      | 12464    | 0.432    | 0.12       | 34421                 | 0.075    | -0.24      | 13984    | 0.926    | 0.01       | 34421              | 0.075    | -0.24      | 13984    | 0.926    | 0.01       |
| SIAB             | 34244         | 0.084    | -0.24      | 14562    | 0.866    | -0.03      | 37133       | 0.011    | -0.34      | 15403    | 0.581    | -0.09      | 33094                 | 0.156    | -0.19      | 14185    | 0.998    | 0.00       | 33094              | 0.156    | -0.19      | 14185    | 0.998    | 0.00       |
| BMI              | 27287         | 0.91     | 0.02       | 27287    | 0.91     | 0.02       | 28180       | 0.904    | -0.02      | 28180    | 0.904    | -0.02      | 26716                 | 0.793    | 0.04       | 17980    | 0.08     | -0.27      | 26716              | 0.793    | 0.04       | 17980    | 0.08     | -0.27      |

Patient Health Questionnaire 9 (PHQ-9), Beck Depression Inventory II (BDI-II), Brief Symptom Inventory scale 4 (BSI-D), Generalized Anxiety Disorder Questionnaire (GAD-7), Brief Symptom Inventory scale 5 (BSI-A), Eating Disorder Inventory (EDI-II), Structured Interview for Anorexic and Bulimic Eating Disorders (SIAB), Body Mass Index (BMI).

**Table S1.** Mann-Whitney U test for differences in alpha diversity indices between groups with higher and lower improvement of anxiety, depression and eating disorder pathology symptoms and groups with higher and lower increase of BMI during inpatient treatment.

| Psyche variables | Shannon index |       |       |       |     |       |       |       | Chao1 index |       |       |       |     |       |       |       | Inverse Simpson index |       |       |       |     |       |       |       | Gini Simpson index |       |       |       |     |       |       |       |
|------------------|---------------|-------|-------|-------|-----|-------|-------|-------|-------------|-------|-------|-------|-----|-------|-------|-------|-----------------------|-------|-------|-------|-----|-------|-------|-------|--------------------|-------|-------|-------|-----|-------|-------|-------|
|                  | T1            |       |       |       | T2  |       |       |       | T1          |       |       |       | T2  |       |       |       | T1                    |       |       |       | T2  |       |       |       | T1                 |       |       |       | T2  |       |       |       |
|                  | U             | Z     | p     | r     | U   | Z     | p     | r     | U           | Z     | p     | r     | U   | Z     | p     | r     | U                     | Z     | p     | r     | U   | Z     | p     | r     | U                  | Z     | p     | r     | U   | Z     | p     | r     |
| PHQ-9            | 209           | -0.28 | 0.778 | -0.04 | 224 | -0.61 | 0.951 | -0.01 | 214         | -0.15 | 0.881 | -0.02 | 224 | -0.06 | 0.951 | -0.01 | 204                   | -0.47 | 0.685 | -0.06 | 226 | -0.11 | 0.912 | -0.02 | 204                | -0.47 | 0.685 | -0.06 | 226 | -0.11 | 0.912 | -0.02 |
| BDI-II           | 140           | -0.41 | 0.684 | -0.05 | 140 | -0.41 | 0.684 | -0.06 | 152         | 0     | 1     | 0     | 140 | -0.41 | 0.684 | -0.06 | 140                   | -0.41 | 0.684 | -0.06 | 137 | -0.51 | 0.613 | -0.08 | 140                | -0.41 | 0.684 | -0.06 | 137 | -0.51 | 0.613 | -0.08 |
| BSI-D            | 207           | -0.76 | 0.448 | -0.1  | 218 | -0.5  | 0.616 | -0.08 | 251         | -0.25 | 0.804 | -0.03 | 218 | -0.5  | 0.616 | -0.08 | 212                   | -0.64 | 0.521 | -0.10 | 194 | -1.07 | 0.287 | -0.16 | 212                | -0.64 | 0.521 | -0.10 | 194 | -1.07 | 0.287 | -0.16 |
| GAD-7            | 251           | -0.47 | 0.639 | -0.06 | 267 | -0.86 | 0.392 | -0.13 | 212         | -0.44 | 0.662 | -0.06 | 267 | -0.86 | 0.392 | -0.13 | 244                   | -0.3  | 0.764 | -0.05 | 265 | -0.81 | 0.420 | -0.12 | 244                | -0.3  | 0.764 | -0.05 | 265 | -0.81 | 0.420 | -0.12 |
| BSI-A            | 303           | -1.47 | 0.142 | -0.2  | 272 | -0.74 | 0.462 | -0.11 | 289         | -0.14 | 0.253 | -0.15 | 272 | -0.74 | 0.462 | -0.11 | 300                   | -1.4  | 0.162 | -0.21 | 272 | -0.74 | 0.462 | -0.11 | 300                | -1.4  | 0.162 | -0.21 | 272 | -0.74 | 0.462 | -0.11 |
| EDI-II           | 217           | -0.57 | 0.569 | -0.08 | 264 | -0.5  | 0.617 | -0.08 | 190         | -1.2  | 0.231 | -0.16 | 264 | -0.5  | 0.617 | -0.08 | 217                   | -0.57 | 0.569 | -0.09 | 273 | -0.71 | 0.478 | -0.11 | 217                | -0.57 | 0.569 | -0.09 | 273 | -0.71 | 0.478 | -0.11 |
| SIAB             | 194           | -1.11 | 0.268 | -0.15 | 216 | -0.59 | 0.553 | -0.1  | 164         | -1.81 | 0.07  | -0.24 | 216 | -0.59 | 0.553 | -0.09 | 197                   | -1.04 | 0.3   | -0.16 | 221 | -0.48 | 0.634 | -0.07 | 197                | -1.04 | 0.3   | -0.16 | 221 | -0.48 | 0.634 | -0.07 |
| BMI              | 153           | -2.08 | 0.038 | 0.28  | 192 | -1.14 | 0.252 | -0.17 | 216         | -0.59 | 0.557 | -0.08 | 192 | -1.14 | 0.252 | -0.17 | 339                   | -2.3  | 0.022 | -0.35 | 297 | -2.3  | 0.198 | -0.35 | 339                | -2.3  | 0.022 | -0.35 | 297 | -2.3  | 0.198 | -0.35 |

Grouping was based on median splits of the increase in symptom severity and BMI scores between T1 and T2. Patient Health Questionnaire 9 (PHQ-9), Beck Depression Inventory II (BDI-II), Brief Symptom Inventory scale 4 (BSI-D), Generalized Anxiety Disorder Questionnaire (GAD-7), Brief Symptom Inventory scale 5 (BSI-A), Eating Disorder Inventory (EDI-II), Structured Interview for Anorexic and Bulimic Eating Disorders (SIAB), Body Mass Index (BMI)

**Table S2.** Mann-Whitney-U test for differences in beta diversity measurements between groups with higher and lower symptom severity of anxiety, depression and eating disorder pathology and groups with higher and lower BMI before (T1) and after weight rehabilitation (T2).

| Psyche variables | Bray-Curtis index |          |          |          |          |          |          |          | Unweighted Unifrac distance |          |          |          |          |          |          |          | Weighted Unifrac distance |          |          |          |          |          |          |          |
|------------------|-------------------|----------|----------|----------|----------|----------|----------|----------|-----------------------------|----------|----------|----------|----------|----------|----------|----------|---------------------------|----------|----------|----------|----------|----------|----------|----------|
|                  | T1                |          |          |          | T2       |          |          |          | T1                          |          |          |          | T2       |          |          |          | T1                        |          |          |          | T2       |          |          |          |
|                  | <i>U</i>          | <i>Z</i> | <i>p</i> | <i>r</i> | <i>U</i> | <i>Z</i> | <i>p</i> | <i>r</i> | <i>U</i>                    | <i>Z</i> | <i>p</i> | <i>r</i> | <i>U</i> | <i>Z</i> | <i>p</i> | <i>r</i> | <i>U</i>                  | <i>Z</i> | <i>p</i> | <i>r</i> | <i>U</i> | <i>Z</i> | <i>p</i> | <i>r</i> |
| PHQ-9            | 43509             | -7.14    | < 0.001  | -0.96    | 13581    | -6.59    | < 0.001  | -0.99    | 61050                       | -1.86    | 0.063    | -0.25    | 15561    | -6.05    | < 0.001  | -0.91    | 48866                     | -4.94    | < 0.001  | -0.67    | 15182    | -6.34    | < 0.001  | -0.96    |
| BDI-II           | 20726             | -7.04    | < 0.001  | -0.95    | 17711    | -3.17    | < 0.01   | -0.48    | 29196                       | -3.11    | < 0.01   | -0.42    | 16236    | -4.36    | < 0.001  | -0.66    | 23293                     | -5.34    | < 0.001  | -0.72    | 18411    | -2.6     | < 0.01   | -0.39    |
| BSI-D            | 37032             | -2.15    | < 0.05   | -0.29    | 20944    | -3.31    | < 0.001  | -0.5     | 37171                       | -2.06    | < 0.05   | -0.28    | 23554    | -1.48    | 0.14     | -0.22    | 37564                     | -1.78    | < 0.001  | -0.24    | 20673    | -3.5     | < 0.001  | -0.53    |
| GAD-7            | 59726             | -1.58    | 0.115    | -0.21    | 13609    | -5.38    | < 0.001  | -0.81    | 78108                       | -3.37    | < 0.001  | -0.45    | 18503    | -2.76    | < 0.01   | -0.42    | 59263                     | -1.74    | 0.081    | -0.23    | 13501    | -5.48    | < 0.001  | -0.83    |
| BSI-A            | 69877             | -1.64    | 0.1      | -0.22    | 23586    | -0.91    | 0.365    | -0.14    | 66533                       | -0.45    | 0.65     | -0.06    | 23026    | -1.3     | 0.192    | -0.2     | 75439                     | -3.6     | < 0.001  | -0.49    | 24679    | -0.13    | 0.897    | -0.02    |
| EDI-II           | 62430             | -1.38    | 0.169    | -0.18    | 34878    | -4.39    | < 0.001  | -0.66    | 97615                       | -8.21    | < 0.001  | -1.1     | 33926    | -3.51    | < 0.001  | -0.53    | 48028                     | -6.45    | < 0.001  | -0.87    | 36842    | -7.08    | < 0.001  | -1.07    |
| SIAB             | 50063             | -5.73    | < 0.001  | -0.77    | 19417    | -5       | < 0.001  | -0.75    | 71458                       | -3.37    | 0.07     | -0.45    | 26982    | -0.29    | 0.771    | -0.04    | 48028                     | -6.45    | < 0.001  | -0.87    | 19717    | -4.78    | < 0.001  | -0.72    |
| BMI              | 88383             | -6.83    | < 0.001  | -0.92    | 35512    | -4.95    | < 0.001  | -0.75    | 65616                       | -0.25    | 0.799    | -0.03    | 21291    | -3.76    | < 0.001  | -0.57    | 95252                     | -8.21    | < 0.001  | -1.12    | 43063    | -8.21    | < 0.001  | -1.24    |

Grouping was based on median splits of the symptom severity and BMI scores. Patient Health Questionnaire 9 (PHQ-9), Beck Depression Inventory II (BDI-II), Brief Symptom Inventory scale 4 (BSI-D), Generalized Anxiety Disorder Questionnaire (GAD-7), Brief Symptom Inventory scale 5 (BSI-A), Eating Disorder Inventory (EDI-II), Structured Interview for Anorexic and Bulimic Eating Disorders (SIAB), Body Mass Index (BMI).

**Table S5.** Beta diversity (Bray-Curtis index) in patients with Anorexia Nervosa in relation to body weight status and the severity of symptoms for eating disorder pathology, anxiety, and depression before (T1) and after weight rehabilitation (T2). Permutational Multivariate Analysis of Covariance (PERMANCOVA) was used to adjust for Body Mass Index (BMI).

|                  | T1 |          |         |        |        | T2 |          |         |        |        |
|------------------|----|----------|---------|--------|--------|----|----------|---------|--------|--------|
| Depression       | Df | SumOfSqs | R2      | F      | Pr(>F) | Df | SumOfSqs | R2      | F      | Pr(>F) |
| PHQ-9            | 1  | 0.15     | 0.0164  | 0.91   | 0.48   | 1  | 0.15     | 0.02402 | 1.05   | 0.35   |
| BMI              | 1  | 0.48     | 0.0512  | 2.85   | 0.01   | 1  | 0.40     | 0.06295 | 2.76   | 0.01   |
| Residual         | 52 | 8.6845   | 0.9325  |        |        | 40 | 5.7594   | 0.91303 |        |        |
| Total            | 54 | 9.3133   | 1       |        |        | 42 | 6.3081   | 1       |        |        |
| BDI-II           | 1  | 0.1691   | 0.0211  | 0.994  | 0.381  | 1  | 0.1256   | 0.01992 | 0.8453 | 0.553  |
| BMI              | 1  | 0.3586   | 0.04476 | 2.1082 | 0.045  | 1  | 0.3847   | 0.06101 | 2.5889 | 0.005  |
| Residual         | 44 | 7.4836   | 0.93414 |        |        | 39 | 5.7956   | 0.91907 |        |        |
| Total            | 46 | 8.0113   | 1       |        |        | 41 | 6.3059   | 1       |        |        |
| BSI-D            | 1  | 0.0819   | 0.00879 | 0.488  | 0.928  | 1  | 0.1144   | 0.01776 | 0.785  | 0.622  |
| BMI              | 1  | 0.5076   | 0.0545  | 3.0257 | 0.006  | 1  | 0.3512   | 0.05452 | 2.4093 | 0.018  |
| Residual         | 52 | 8.7238   | 0.9367  |        |        | 41 | 5.9758   | 0.92772 |        |        |
| Total            | 54 | 9.3133   | 1       |        |        | 43 | 6.4414   | 1       |        |        |
| Anxiety disorder |    |          |         |        |        |    |          |         |        |        |
| GAD-7            | 1  | 0.1958   | 0.02102 | 1.1806 | 0.284  | 1  | 0.1577   | 0.02501 | 1.0816 | 0.341  |
| BMI              | 1  | 0.4946   | 0.05311 | 2.9827 | 0.009  | 1  | 0.3165   | 0.05018 | 2.1703 | 0.019  |
| Residual         | 52 | 8.6229   | 0.92587 |        |        | 40 | 5.8338   | 0.92481 |        |        |
| Total            | 54 | 9.3133   | 1       |        |        | 42 | 6.3081   | 1       |        |        |
| BDI-A            | 1  | 0.0889   | 0.00955 | 0.5306 | 0.885  | 1  | 0.1276   | 0.01981 | 0.8815 | 0.517  |
| BMI              | 1  | 0.5098   | 0.05474 | 3.0418 | 0.002  | 1  | 0.3785   | 0.05877 | 2.615  | 0.006  |
| Residual         | 52 | 8.7146   | 0.93572 |        |        | 41 | 5.9352   | 0.92142 |        |        |
| Total            | 54 | 9.3133   | 1       |        |        | 43 | 6.4414   | 1       |        |        |
| Eating disorder  |    |          |         |        |        |    |          |         |        |        |
| EDI-II           | 1  | 0.4625   | 0.04966 | 2.827  | 0.01   | 1  | 0.1538   | 0.02388 | 1.0629 | 0.355  |
| BMI              | 1  | 0.3437   | 0.03691 | 2.1012 | 0.041  | 1  | 0.3546   | 0.05505 | 2.4502 | 0.013  |
| Residual         | 52 | 8.5071   | 0.91343 |        |        | 41 | 5.933    | 0.92108 |        |        |
| Total            | 54 | 9.3133   | 1       |        |        | 43 | 6.4414   | 1       |        |        |
| SIAB             | 1  | 0.6963   | 0.07476 | 4.3442 | 0.002  | 1  | 0.149    | 0.02313 | 1.0284 | 0.396  |
| BMI              | 1  | 0.2825   | 0.03034 | 1.7628 | 0.092  | 1  | 0.3526   | 0.05475 | 2.4341 | 0.022  |
| Residual         | 52 | 8.3345   | 0.8949  |        |        | 41 | 5.9398   | 0.92212 |        |        |
| Total            | 54 | 9.3133   | 1       |        |        | 43 | 6.4414   | 1       |        |        |

Patient Health Questionnaire 9 (PHQ-9), Beck Depression Inventory II (BDI-II), Brief Symptom Inventory scale 4 (BSI-D), Generalized Anxiety Disorder Questionnaire (GAD-7), Brief Symptom Inventory scale 5 (BSI-A), Eating Disorder Inventory (EDI-II), Structured Interview for Anorexic and Bulimic Eating Disorders (SIAB), Body Mass Index (BMI).

**Table S6.** Beta diversity (unweighted Unifrac distance) in patients with Anorexia Nervosa in relation to body weight status and the severity of symptoms for eating disorder pathology, anxiety, and depression before (T1) and after weight rehabilitation (T2). Permutational Multivariate Analysis of Covariance (PERMANCOVA) was used to adjust for Body Mass Index (BMI).

|                  | T1 |          |         |        |        | T2 |          |         |        |        |
|------------------|----|----------|---------|--------|--------|----|----------|---------|--------|--------|
| Depression       | Df | SumOfSqs | R2      | F      | Pr(>F) | Df | SumOfSqs | R2      | F      | Pr(>F) |
| PHQ-9            | 1  | 0.1840   | 0.0268  | 1.4617 | 0.126  | 1  | 0.13     | 0.02927 | 1.2671 | 0.173  |
| BMI              | 1  | 0.1381   | 0.0201  | 1.0969 | 0.301  | 1  | 0.20     | 0.04676 | 2.0243 | 0.015  |
| Residual         | 52 | 6.5474   | 0.9531  |        |        | 40 | 3.9831   | 0.92397 |        |        |
| Total            | 54 | 6.8696   | 1.0000  |        |        | 42 | 4.3109   | 1       |        |        |
| BDI-II           | 1  | 0.1668   | 0.02725 | 1.266  | 0.179  | 1  | 0.1144   | 0.02674 | 1.1158 | 0.292  |
| BMI              | 1  | 0.1579   | 0.02579 | 1.1985 | 0.208  | 1  | 0.1658   | 0.03874 | 1.6167 | 0.075  |
| Residual         | 44 | 5.7963   | 0.94696 |        |        | 39 | 3.9986   | 0.93452 |        |        |
| Total            | 46 | 6.1209   | 1       |        |        | 41 | 4.2788   | 1       |        |        |
| BSI-D            | 1  | 0.1116   | 0.01625 | 0.8763 | 0.515  | 1  | 0.0882   | 0.01995 | 0.8638 | 0.601  |
| BMI              | 1  | 0.134    | 0.0195  | 1.0517 | 0.322  | 1  | 0.1464   | 0.03311 | 1.4337 | 0.123  |
| Residual         | 52 | 6.6240   | 0.96425 |        |        | 41 | 4.1879   | 0.94694 |        |        |
| Total            | 54 | 6.8696   | 1       |        |        | 43 | 4.4226   | 1       |        |        |
| Anxiety disorder |    |          |         |        |        |    |          |         |        |        |
| GAD-7            | 1  | 0.1316   | 0.01916 | 1.0362 | 0.312  | 1  | 0.1138   | 0.0264  | 1.1298 | 0.249  |
| BMI              | 1  | 0.1314   | 0.01913 | 1.0342 | 0.363  | 1  | 0.1675   | 0.03886 | 1.6629 | 0.059  |
| Residual         | 52 | 6.6065   | 0.96171 |        |        | 40 | 4.0295   | 0.93474 |        |        |
| Total            | 54 | 6.8696   | 1       |        |        | 42 | 4.3109   | 1       |        |        |
| BDI-A            | 1  | 0.1141   | 0.01661 | 0.8963 | 0.502  | 1  | 0.1047   | 0.02367 | 1.0315 | 0.369  |
| BMI              | 1  | 0.1365   | 0.01987 | 1.0725 | 0.332  | 1  | 0.1571   | 0.03551 | 1.5476 | 0.078  |
| Residual         | 52 | 6.619    | 0.96352 |        |        | 41 | 4.1609   | 0.94082 |        |        |
| Total            | 54 | 6.8696   | 1       |        |        | 43 | 4.4226   | 1       |        |        |
| Eating disorder  |    |          |         |        |        |    |          |         |        |        |
| EDI-II           | 1  | 0.2657   | 0.03867 | 2.1239 | 0.027  | 1  | 0.1359   | 0.03072 | 1.3451 | 0.129  |
| BMI              | 1  | 0.0997   | 0.01451 | 0.7969 | 0.602  | 1  | 0.1455   | 0.0329  | 1.4405 | 0.099  |
| Residual         | 52 | 6.5042   | 0.94682 |        |        | 41 | 4.1412   | 0.93638 |        |        |
| Total            | 54 | 6.8696   | 1       |        |        | 43 | 4.4226   | 1       |        |        |
| SIAB             | 1  | 0.3042   | 0.04429 | 2.4525 | 0.014  | 1  | 0.0583   | 0.01318 | 0.5672 | 0.956  |
| BMI              | 1  | 0.115    | 0.01674 | 0.927  | 0.449  | 1  | 0.1514   | 0.03423 | 1.4731 | 0.091  |
| Residual         | 52 | 6.4504   | 0.93897 |        |        | 41 | 4.2129   | 0.9526  |        |        |
| Total            | 54 | 6.8696   | 1       |        |        | 43 | 4.4226   | 1       |        |        |

Patient Health Questionnaire 9 (PHQ-9), Beck Depression Inventory II (BDI-II), Brief Symptom Inventory scale 4 (BSI-D), Generalized Anxiety Disorder Questionnaire (GAD-7), Brief Symptom Inventory scale 5 (BSI-A), Eating Disorder Inventory (EDI-II), Structured Interview for Anorexic and Bulimic Eating Disorders (SIAB), Body Mass Index (BMI).

**Table S7.** Beta diversity (weighted Unifrac distance) in patients with Anorexia Nervosa in relation to body weight status and the severity of symptoms for eating disorder pathology, anxiety, and depression before (T1) and after weight rehabilitation (T2) and their changes during inpatient treatment (longitudinal). Permutational Multivariate Analysis of Covariance (PERMANCOVA) was used to adjust for Body Mass Index (BMI).

| Depression       | T1 |          |         |        |        | T2 |          |         |        |        |
|------------------|----|----------|---------|--------|--------|----|----------|---------|--------|--------|
|                  | Df | SumOfSqs | R2      | F      | Pr(>F) | Df | SumOfSqs | R2      | F      | Pr(>F) |
| PHQ-9            | 1  | 0.05     | 0.02302 | 1.2662 | 0.218  | 1  | 0.04     | 0.02988 | 1.3470 | 0.216  |
| BMI              | 1  | 0.07     | 0.03171 | 1.7445 | 0.118  | 1  | 0.12     | 0.08279 | 3.7323 | 0.002  |
| Residual         | 52 | 2.0731   | 0.94527 |        |        | 40 | 1.2542   | 0.88733 |        |        |
| Total            | 54 | 2.1932   | 1       |        |        | 42 | 1.4135   | 1       |        |        |
| BDI-II           | 1  | 0.04653  | 0.02482 | 1.1466 | 0.274  | 1  | 0.04219  | 0.02984 | 1.3048 | 0.224  |
| BMI              | 1  | 0.04268  | 0.02276 | 1.0516 | 0.337  | 1  | 0.11057  | 0.07821 | 3.4198 | 0.012  |
| Residual         | 44 | 1.7857   | 0.95242 |        |        | 39 | 1.2609   | 0.89194 |        |        |
| Total            | 46 | 1.8749   | 1       |        |        | 41 | 1.4137   | 1       |        |        |
| BSI-D            | 1  | 0.01488  | 0.00678 | 0.3675 | 0.951  | 1  | 0.0341   | 0.02359 | 1.0662 | 0.331  |
| BMI              | 1  | 0.07332  | 0.03343 | 1.8113 | 0.103  | 1  | 0.0999   | 0.06912 | 3.1233 | 0.012  |
| Residual         | 52 | 2.1050   | 0.95979 |        |        | 41 | 1.3112   | 1       |        |        |
| Total            | 54 | 2.1932   | 1       |        |        | 43 | 1.44513  | 1       |        |        |
| Anxiety disorder |    |          |         |        |        |    |          |         |        |        |
| GAD-7            | 1  | 0.02933  | 0.01337 | 0.729  | 0.574  | 1  | 0.03386  | 0.02395 | 1.0594 | 0.314  |
| BMI              | 1  | 0.07192  | 0.03279 | 1.7879 | 0.109  | 1  | 0.10133  | 0.07169 | 3.1707 | 0.007  |
| Residual         | 52 | 2.09192  | 0.95383 |        |        | 40 | 1.27831  | 0.90436 |        |        |
| Total            | 54 | 2.19317  | 1       |        |        | 42 | 1.4135   | 1       |        |        |
| BDI-A            | 1  | 0.02671  | 0.01218 | 0.6642 | 0.688  | 1  | 0.05063  | 0.03503 | 1.6212 | 0.119  |
| BMI              | 1  | 0.07552  | 0.03444 | 1.8782 | 0.092  | 1  | 0.11412  | 0.07897 | 3.6543 | 0.005  |
| Residual         | 52 | 2.09094  | 0.95339 |        |        | 41 | 1.28039  | 0.886   |        |        |
| Total            | 54 | 2.19317  | 1       |        |        | 43 | 1.44513  | 1       |        |        |
| Eating disorder  |    |          |         |        |        |    |          |         |        |        |
| EDI-II           | 1  | 0.09817  | 0.04476 | 2.505  | 0.04   | 1  | 0.06994  | 0.0484  | 2.2485 | 0.04   |
| BMI              | 1  | 0.057    | 0.02599 | 1.4543 | 0.176  | 1  | 0.09994  | 0.06915 | 3.213  | 0.01   |
| Residual         | 52 | 2.038    | 0.92925 |        |        | 41 | 1.27526  | 0.88245 |        |        |
| Total            | 54 | 2.19317  | 1       |        |        | 43 | 1.44513  | 1       |        |        |
| SIAB             | 1  | 0.07594  | 0.03462 | 1.9106 | 0.08   | 1  | 0.05082  | 0.03517 | 1.619  | 0.119  |
| BMI              | 1  | 0.05054  | 0.02304 | 1.2716 | 0.225  | 1  | 0.10729  | 0.07424 | 3.4178 | 0.006  |
| Residual         | 52 | 2.0667   | 0.94233 |        |        | 41 | 1.28702  | 0.89059 |        |        |
| Total            | 54 | 2.19317  | 1       |        |        | 43 | 1.44513  | 1       |        |        |

Patient Health Questionnaire 9 (PHQ-9), Beck Depression Inventory II (BDI-II), Brief Symptom Inventory scale 4 (BSI-D), Generalized Anxiety Disorder Questionnaire (GAD-7), Brief Symptom Inventory scale 5 (BSI-A), Eating Disorder Inventory (EDI-II), Structured Interview for Anorexic and Bulimic Eating Disorders (SIAB), Body Mass Index (BMI).



**Table S8.** Mann-Whitney-U test for differences in beta diversity measurements between groups with higher and lower improvement of anxiety, depression and eating disorder pathology symptoms and groups with higher and lower increase of BMI during inpatient treatment.

| Psyche variables | Bray-Curtis index |          |          |          |          |          |          |          | Unweighted Unifrac distance |          |          |          |          |          |          |          | Weighted Unifrac distance |          |          |          |          |          |          |          |
|------------------|-------------------|----------|----------|----------|----------|----------|----------|----------|-----------------------------|----------|----------|----------|----------|----------|----------|----------|---------------------------|----------|----------|----------|----------|----------|----------|----------|
|                  | T1                |          |          |          | T2       |          |          |          | T1                          |          |          |          | T2       |          |          |          | T1                        |          |          |          | T2       |          |          |          |
|                  | <i>U</i>          | <i>Z</i> | <i>p</i> | <i>r</i> | <i>U</i> | <i>Z</i> | <i>p</i> | <i>r</i> | <i>U</i>                    | <i>Z</i> | <i>p</i> | <i>r</i> | <i>U</i> | <i>Z</i> | <i>p</i> | <i>r</i> | <i>U</i>                  | <i>Z</i> | <i>p</i> | <i>r</i> | <i>U</i> | <i>Z</i> | <i>p</i> | <i>r</i> |
| PHQ-9            | 19227             | -2.2     | <0.05    | -0.3     | 18412    | -2.83    | <0.001   | -0.43    | 24364                       | -1.74    | 0.083    | -0.23    | 25581    | -2.67    | <0.01    | -0.4     | 17942                     | -3.19    | <0.01    | -0.43    | 16941    | -1.77    | 0.076    | 0.27     |
| BDI-II           | 7654              | -3.9     | <0.001   | -0.52    | 7732     | -3.77    | <0.001   | -0.57    | 10083                       | -0.45    | 0.651    | -0.06    | 11444    | -1.47    | 0.143    | -0.22    | 7655                      | -3.88    | <0.001   | -0.52    | 7101     | -2.95    | <0.01    | -0.44    |
| BSI-D            | 27471             | -0.88    | 0.381    | -0.12    | 22321    | -2.73    | <0.01    | -0.41    | 27290                       | -0.75    | 0.454    | -0.1     | 26279    | -0.04    | 0.967    | -0.01    | 28128                     | -1.34    | 0.182    | -0.18    | 21184    | -3.52    | <0.001   | -0.53    |
| GAD-7            | 23571             | -0.51    | 0.609    | -0.09    | 20162    | -3.06    | <0.01    | -0.46    | 23406                       | -0.63    | 0.526    | -0.09    | 24680    | -0.32    | 0.751    | -0.05    | 23682                     | -0.43    | 0.668    | -0.06    | 19877    | -3.27    | <0.01    | -0.49    |
| BSI-A            | 26196             | -0.02    | 0.987    | 0        | 25853    | -0.26    | 0.798    | -0.04    | 21584                       | -3.24    | <0.01    | -0.44    | 19231    | -3.29    | <0.001   | -0.5     | 28585                     | -1.66    | 0.098    | -0.22    | 26553    | -0.23    | 0.816    | -0.04    |
| EDI-II           | 16360             | -6.18    | <0.001   | -0.83    | 14888    | -8.21    | <0.001   | -1.24    | 31884                       | -3.63    | <0.001   | -0.49    | 32226    | -3.86    | <0.001   | -0.58    | 16049                     | -6.43    | <0.001   | -0.87    | 16000    | -6.5     | <0.001   | -0.98    |
| SIAB             | 18467             | -4.41    | <0.001   | -0.66    | 16244    | -6.27    | <0.001   | -0.95    | 36139                       | -5.48    | <0.001   | -0.83    | 38862    | -8.21    | <0.001   | -1.24    | 16660                     | -5.94    | <0.001   | -0.9     | 15593    | -6.79    | <0.001   | -1.02    |
| BMI              | 18711             | -5.48    | <0.001   | -0.74    | 27329    | -0.53    | 0.594    | -0.08    | 21019                       | -3.87    | <0.001   | -0.52    | 21765    | -3.35    | <0.001   | -0.5     | 20317                     | -2.48    | <0.05    | -0.33    | 30975    | -3.08    | <0.01    | -0.46    |

Grouping was based on median splits of the increase in symptom severity and BMI scores between T1 and T2. Patient Health Questionnaire 9 (PHQ-9), Beck Depression Inventory II (BDI-II), Brief Symptom Inventory scale 4 (BSI-D), Generalized Anxiety Disorder Questionnaire (GAD-7), Brief Symptom Inventory scale 5 (BSI-A), Eating Disorder Inventory (EDI-II), Structured Interview for Anorexic and Bulimic Eating Disorders (SIAB), Body Mass Index (BMI).

**Table S9.** Beta diversity (Bray-Curtis index) in patients with Anorexia Nervosa before (T1) and after weight rehabilitation (T2) in relation to the degree of improvement of body weight, symptoms for eating disorder pathology, anxiety and depression during inpatient treatment. Permutational Multivariate Analysis of Covariance (PERMANCOVA) was used to adjust for Body Mass Index (BMI).

|                  | T1 |          |         |        |        | T2 |          |         |        |        |
|------------------|----|----------|---------|--------|--------|----|----------|---------|--------|--------|
| Depression       | Df | SumOfSqs | R2      | F      | Pr(>F) | Df | SumOfSqs | R2      | F      | Pr(>F) |
| PHQ-9            | 1  | 0.10     | 0.01386 | 0.6    | 0.82   | 1  | 0.13     | 0.02106 | 0.9    | 0.49   |
| BMI              | 1  | 0.42     | 0.06004 | 2.59   | 0.02   | 1  | 0.29     | 0.04651 | 2.     | 0.04   |
| Residual         | 40 | 6.5475   | 0.92610 |        |        | 40 | 5.8818   | 0.93243 |        |        |
| Total            | 42 | 7.0700   | 1       |        |        | 42 | 6.3081   | 1       |        |        |
| BDI-II           | 1  | 0.1415   | 0.02338 | 0.8045 | 0.564  | 1  | 0.1517   | 0.02855 | 0.9856 | 0.422  |
| BMI              | 1  | 0.2814   | 0.0465  | 1.5996 | 0.134  | 1  | 0.237    | 0.0446  | 1.5398 | 0.132  |
| Residual         | 32 | 5.6300   | 0.93012 |        |        | 32 | 4.9263   | 0.92685 |        |        |
| Total            | 34 | 6.0529   | 1       |        |        | 34 | 5.3151   | 1       |        |        |
| BSI-D            | 1  | 0.1709   | 0.02374 | 1.0648 | 0.35   | 1  | 0.1233   | 0.01914 | 0.8468 | 0.579  |
| BMI              | 1  | 0.4489   | 0.06233 | 2.7964 | 0.008  | 1  | 0.3485   | 0.05411 | 2.3937 | 0.017  |
| Residual         | 41 | 6.5819   | 0.91393 |        |        | 41 | 5.9696   | 0.92675 |        |        |
| Total            | 43 | 7.2018   | 1       |        |        | 43 | 6.4414   | 1       |        |        |
| Anxiety disorder |    |          |         |        |        |    |          |         |        |        |
| GAD-7            | 1  | 0.1683   | 0.0238  | 1.0451 | 0.365  | 1  | 0.1137   | 0.01802 | 0.7779 | 0.632  |
| BMI              | 1  | 0.4607   | 0.06517 | 2.8612 | 0.006  | 1  | 0.3485   | 0.05525 | 2.3846 | 0.018  |
| Residual         | 40 | 6.441    | 0.91103 |        |        | 40 | 5.8459   | 0.92673 |        |        |
| Total            | 42 | 7.07     | 1       |        |        | 42 | 6.3081   | 1       |        |        |
| BDI-A            | 1  | 0.1684   | 0.02338 | 1.0474 | 0.353  | 1  | 0.1771   | 0.0275  | 1.2277 | 0.252  |
| BMI              | 1  | 0.4418   | 0.06134 | 2.7477 | 0.013  | 1  | 0.3497   | 0.05429 | 2.424  | 0.015  |
| Residual         | 41 | 6.5916   | 0.91528 |        |        | 41 | 5.9146   | 0.91822 |        |        |
| Total            | 43 | 7.2018   | 1       |        |        | 43 | 6.4414   | 1       |        |        |
| Eating disorder  |    |          |         |        |        |    |          |         |        |        |
| EDI-II           | 1  | 0.2667   | 0.03703 | 1.6408 | 0.096  | 1  | 0.2763   | 0.04289 | 1.9128 | 0.04   |
| BMI              | 1  | 0.2707   | 0.03759 | 1.6655 | 0.088  | 1  | 0.2434   | 0.03779 | 1.6853 | 0.068  |
| Residual         | 41 | 6.6643   | 0.92538 |        |        | 41 | 5.9217   | 0.91932 |        |        |
| Total            | 43 | 7.2018   | 1       |        |        | 43 | 6.4414   | 1       |        |        |
| SIAB             | 1  | 0.5037   | 0.06995 | 3.2048 | 0.002  | 1  | 0.5206   | 0.08081 | 3.7496 | 0.003  |
| BMI              | 1  | 0.2535   | 0.0352  | 1.6126 | 0.119  | 1  | 0.2288   | 0.03552 | 1.648  | 0.085  |
| Residual         | 41 | 6.4445   | 0.89486 |        |        | 41 | 5.692    | 0.88367 |        |        |
| Total            | 43 | 7.2018   | 1       |        |        | 43 | 6.4414   | 1       |        |        |

Patient Health Questionnaire 9 (PHQ-9), Beck Depression Inventory II (BDI-II), Brief Symptom Inventory scale 4 (BSI-D), Generalized Anxiety Disorder Questionnaire (GAD-7), Brief Symptom Inventory scale 5 (BSI-A), Eating Disorder Inventory (EDI-II), Structured Interview for Anorexic and Bulimic Eating Disorders (SIAB), Body Mass Index (BMI).

**Table S10.** Beta diversity (unweighted Unifrac distance) in patients with Anorexia Nervosa before (T1) and after weight rehabilitation (T2) in relation to the degree of improvement of body weight, symptoms for eating disorder pathology, anxiety, and depression during inpatient treatment. Permutational Multivariate Analysis of Covariance (PERMANCOVA) was used to adjust for Body Mass Index (BMI).

|                  | T1 |          |         |        |        | T2 |          |         |        |        |
|------------------|----|----------|---------|--------|--------|----|----------|---------|--------|--------|
| Depression       | Df | SumOfSqs | R2      | F      | Pr(>F) | Df | SumOfSqs | R2      | F      | Pr(>F) |
| PHQ-9            | 1  | 0.12     | 0.0228  | 0.9566 | 0.389  | 1  | 0.11     | 0.02656 | 1.1264 | 0.264  |
| BMI              | 1  | 0.13     | 0.0253  | 1.0620 | 0.311  | 1  | 0.13     | 0.03037 | 1.2880 | 0.175  |
| Residual         | 40 | 5.0077   | 0.9520  |        |        | 40 | 4.0655   | 0.94308 |        |        |
| Total            | 42 | 5.2605   | 1       |        |        | 42 | 4.3109   | 1       |        |        |
| BDI-II           | 1  | 0.104    | 0.02281 | 0.7683 | 0.667  | 1  | 0.1209   | 0.03278 | 1.1265 | 0.28   |
| BMI              | 1  | 0.1232   | 0.02702 | 0.9101 | 0.455  | 1  | 0.1335   | 0.0362  | 1.2444 | 0.221  |
| Residual         | 32 | 4.3328   | 0.95017 |        |        | 32 | 3.4332   | 0.93102 |        |        |
| Total            | 34 | 4.5600   | 1       |        |        | 34 | 3.6876   | 1       |        |        |
| BSI-D            | 1  | 0.0774   | 0.01442 | 0.6144 | 0.886  | 1  | 0.0907   | 0.0205  | 0.8876 | 0.563  |
| BMI              | 1  | 0.1241   | 0.02311 | 0.9844 | 0.394  | 1  | 0.1437   | 0.0325  | 1.4069 | 0.12   |
| Residual         | 41 | 5.1673   | 0.96247 |        |        | 41 | 4.1882   | 0.947   |        |        |
| Total            | 43 | 5.3688   | 1       |        |        | 43 | 4.4226   | 1       |        |        |
| Anxiety disorder |    |          |         |        |        |    |          |         |        |        |
| GAD-7            | 1  | 0.1668   | 0.03171 | 1.3448 | 0.156  | 1  | 0.1027   | 0.02381 | 1.0097 | 0.414  |
| BMI              | 1  | 0.1327   | 0.02523 | 1.0703 | 0.295  | 1  | 0.1413   | 0.03277 | 1.3894 | 0.136  |
| Residual         | 40 | 4.9609   | 0.94306 |        |        | 40 | 4.0669   | 0.94342 |        |        |
| Total            | 42 | 5.2605   | 1       |        |        | 42 | 4.3109   | 1       |        |        |
| BDI-A            | 1  | 0.0954   | 0.01778 | 0.7613 | 0.687  | 1  | 0.1452   | 0.03283 | 1.438  | 0.1    |
| BMI              | 1  | 0.1335   | 0.02486 | 1.0648 | 0.314  | 1  | 0.1374   | 0.03106 | 1.3605 | 0.132  |
| Residual         | 41 | 5.1399   | 0.95736 |        |        | 41 | 4.14     | 0.9361  |        |        |
| Total            | 43 | 5.3688   | 1       |        |        | 43 | 4.4226   | 1       |        |        |
| Eating disorder  |    |          |         |        |        |    |          |         |        |        |
| EDI-II           | 1  | 0.1409   | 0.02625 | 1.1234 | 0.294  | 1  | 0.152    | 0.03437 | 1.4925 | 0.078  |
| BMI              | 1  | 0.0847   | 0.01578 | 0.6755 | 0.811  | 1  | 0.0955   | 0.0216  | 0.9381 | 0.46   |
| Residual         | 41 | 5.1431   | 0.95797 |        |        | 41 | 4.1751   | 0.94403 |        |        |
| Total            | 43 | 5.3688   | 1       |        |        | 43 | 4.4226   | 1       |        |        |
| SIAB             | 1  | 0.2314   | 0.0431  | 1.8811 | 0.045  | 1  | 0.2617   | 0.05918 | 2.6429 | 0.004  |
| BMI              | 1  | 0.0938   | 0.01748 | 0.7628 | 0.683  | 1  | 0.1009   | 0.02281 | 1.0189 | 0.392  |
| Residual         | 41 | 5.0435   | 0.93942 |        |        | 41 | 4.06     | 0.91801 |        |        |
| Total            | 43 | 5.3688   | 1       |        |        | 43 | 4.4226   | 1       |        |        |

Patient Health Questionnaire 9 (PHQ-9), Beck Depression Inventory II (BDI-II), Brief Symptom Inventory scale 4 (BSI-D), Generalized Anxiety Disorder Questionnaire (GAD-7), Brief Symptom Inventory scale 5 (BSI-A), Eating Disorder Inventory (EDI-II), Structured Interview for Anorexic and Bulimic Eating Disorders (SIAB), Body Mass Index (BMI).

**Table S11.** Beta diversity (weighted Unifrac distance) before (T1) and after weight rehabilitation (T2) in patients with Anorexia Nervosa in relation to the degree of improvement of body weight, symptoms for eating disorder pathology, anxiety, and depression during inpatient treatment. Permutational Multivariate Analysis of Covariance (PERMANCOVA) was used to adjust for Body Mass Index (BMI).

|                  | T1 |          |         |        |        | T2 |          |         |        |        |
|------------------|----|----------|---------|--------|--------|----|----------|---------|--------|--------|
| Depression       | Df | SumOfSqs | R2      | F      | Pr(>F) | Df | SumOfSqs | R2      | F      | Pr(>F) |
| PHQ-9            | 1  | 0.03     | 0.01622 | 0.6884 | 0.66   | 1  | 0.03     | 0.01925 | 0.8316 | 0.548  |
| BMI              | 1  | 0.07     | 0.04142 | 1.7582 | 0.136  | 1  | 0.08     | 0.05486 | 2.3702 | 0.034  |
| Residual         | 40 | 1.5828   | 0.94236 |        |        | 40 | 1.3087   | 0.92589 |        |        |
| Total            | 42 | 1.6796   | 1       |        |        | 42 | 1.4135   | 1       |        |        |
| BDI-II           | 1  | 0.03171  | 0.0224  | 0.7558 | 0.539  | 1  | 0.05002  | 0.0415  | 1.4618 | 0.158  |
| BMI              | 1  | 0.04126  | 0.02915 | 0.9834 | 0.361  | 1  | 0.0603   | 0.05003 | 1.7622 | 0.108  |
| Residual         | 32 | 1.3427   | 0.94845 |        |        | 32 | 1.0950   | 0.90847 |        |        |
| Total            | 34 | 1.4157   | 1       |        |        | 34 | 1.2054   | 1       |        |        |
| BSI-D            | 1  | 0.04125  | 0.02423 | 1.0652 | 0.329  | 1  | 0.04263  | 0.0295  | 1.3339 | 0.205  |
| BMI              | 1  | 0.0737   | 0.04328 | 1.9027 | 0.078  | 1  | 0.0922   | 0.06383 | 2.8864 | 0.018  |
| Residual         | 41 | 1.5879   | 1       |        |        | 41 | 1.3103   | 1       |        |        |
| Total            | 43 | 1.70286  | 1       |        |        | 43 | 1.44513  | 1       |        |        |
| Anxiety disorder |    |          |         |        |        |    |          |         |        |        |
| GAD-7            | 1  | 0.03203  | 0.01907 | 0.8156 | 0.524  | 1  | 0.02318  | 0.0164  | 0.7138 | 0.652  |
| BMI              | 1  | 0.07679  | 0.04572 | 1.9555 | 0.09   | 1  | 0.09163  | 0.06482 | 2.8222 | 0.013  |
| Residual         | 40 | 1.5708   | 0.93521 |        |        | 40 | 1.2987   | 0.91878 |        |        |
| Total            | 42 | 1.67962  | 1       |        |        | 42 | 1.4135   | 1       |        |        |
| BDI-A            | 1  | 0.04337  | 0.02547 | 1.1226 | 0.314  | 1  | 0.02316  | 0.01602 | 0.7168 | 0.643  |
| BMI              | 1  | 0.07551  | 0.04434 | 1.9546 | 0.08   | 1  | 0.09737  | 0.06738 | 3.0139 | 0.015  |
| Residual         | 41 | 1.58398  | 0.93019 |        |        | 41 | 1.3246   | 0.9166  |        |        |
| Total            | 43 | 1.70286  | 1       |        |        | 43 | 1.44513  | 1       |        |        |
| Eating disorder  |    |          |         |        |        |    |          |         |        |        |
| EDI-II           | 1  | 0.05844  | 0.03432 | 1.4945 | 0.169  | 1  | 0.0437   | 0.03024 | 1.3629 | 0.187  |
| BMI              | 1  | 0.04105  | 0.02411 | 1.0498 | 0.332  | 1  | 0.08681  | 0.06007 | 2.7074 | 0.023  |
| Residual         | 41 | 1.60336  | 0.94157 |        |        | 41 | 1.31462  | 0.90969 |        |        |
| Total            | 43 | 1.70286  | 1       |        |        | 43 | 1.44513  | 1       |        |        |
| SIAB             | 1  | 0.07412  | 0.04353 | 1.9238 | 0.073  | 1  | 0.08252  | 0.0571  | 2.63   | 0.021  |
| BMI              | 1  | 0.04901  | 0.02878 | 1.272  | 0.21   | 1  | 0.07612  | 0.05267 | 2.4259 | 0.025  |
| Residual         | 41 | 1.57973  | 0.92769 |        |        | 41 | 1.28649  | 0.89022 |        |        |
| Total            | 43 | 1.70286  | 1       |        |        | 43 | 1.44513  | 1       |        |        |

Patient Health Questionnaire 9 (PHQ-9), Beck Depression Inventory II (BDI-II), Brief Symptom Inventory scale 4 (BSI-D), Generalized Anxiety Disorder Questionnaire (GAD-7), Brief Symptom Inventory scale 5 (BSI-A), Eating Disorder Inventory (EDI-II), Structured Interview for Anorexic and Bulimic Eating Disorders (SIAB), Body Mass Index (BMI).

**Table S12.** Spearman correlation of additional questionnaires for symptom severity of eating disorder pathology, anxiety, and depression before (T1) and after weight rehabilitation (T2) and their changes during inpatient treatment (longitudinal) with the relative abundance of taxa on family level.

|                                          | T1     |       |       |              | T2     |       |       |      | Longitudinal |       |             |             |
|------------------------------------------|--------|-------|-------|--------------|--------|-------|-------|------|--------------|-------|-------------|-------------|
|                                          | BDI-II | BSI-D | BSI-A | SIAB         | BDI-II | BSI-D | BSI-A | SIAB | BDI-II       | BSI-D | BSI-A       | SIAB        |
| f__Bacteroidaceae                        | 0.32   |       |       | <b>0.44</b>  |        |       |       |      |              |       |             |             |
| f__Prevotellaceae                        |        |       |       |              |        |       |       |      | -0.34        |       |             |             |
| f__Ruminococcaceae                       |        |       |       |              | 0.42   | 0.38  |       |      |              |       |             |             |
| f__Christensenellaceae                   |        |       |       |              |        |       |       |      |              |       |             |             |
| f__Rikenellaceae                         |        |       |       |              |        |       |       |      |              |       | 0.37        |             |
| f__Lachnospiraceae                       |        |       |       |              |        |       |       |      |              |       |             |             |
| f__Bifidobacteriaceae                    |        |       |       |              |        |       |       |      | <b>0.45</b>  | 0.31  |             | <b>0.45</b> |
| f__Oscillospiraceae                      |        |       |       |              |        |       |       |      |              |       | <b>0.42</b> |             |
| f__Akermansiaceae                        |        |       |       |              |        |       |       |      |              |       |             |             |
| f__Tannerellaceae                        |        |       |       |              |        |       |       |      |              |       |             |             |
| f__Sutterellaceae                        |        |       |       |              |        |       |       |      |              |       |             |             |
| o__Rhodospirillales Order                |        |       |       |              |        |       |       |      |              |       |             |             |
| f__Erysipelatoclostridiaceae             |        |       |       |              |        |       |       |      |              |       |             |             |
| f__Veillonellaceae                       |        |       |       |              |        |       |       |      |              |       | 0.3         |             |
| f__Acidaminococcaceae                    |        |       | -0.29 | -0.32        |        |       |       |      |              |       |             |             |
| f__Coriobacteriaceae                     |        |       |       |              |        |       |       |      |              |       |             |             |
| o__Gastranaerophilales Order             |        |       | 0.28  | 0.31         |        |       |       |      |              |       | 0.32        |             |
| f__Barnesiellaceae                       |        |       |       |              |        |       |       |      |              |       |             |             |
| f__Desulfovibrionaceae                   |        |       |       |              |        |       | 0.35  |      |              |       |             | -0.3        |
| f__[Eubacterium]_coprostanoligenes_group |        |       |       |              |        |       |       |      |              |       |             |             |
| f__Marinifilaceae                        |        |       |       |              |        |       |       |      |              |       |             |             |
| f__Muribaculaceae                        |        |       |       |              |        |       |       |      |              |       |             |             |
| f__Acholeplasmataceae                    |        |       |       |              |        |       |       |      | 0.38         |       |             | 0.38        |
| o__Clostridia_UCG-014 Order              |        |       |       | <b>-0.34</b> |        |       |       |      |              |       |             |             |
| f__Enterobacteriaceae                    |        |       |       |              |        |       |       |      |              | -0.32 | -0.34       |             |

|                                     |      |      |      |             |      |       |  |  |  |       |             |      |
|-------------------------------------|------|------|------|-------------|------|-------|--|--|--|-------|-------------|------|
| f__Pasteurellaceae                  |      |      |      |             |      |       |  |  |  |       |             |      |
| f__Peptostreptococcaceae            | -0.3 |      |      |             |      |       |  |  |  |       |             |      |
| f__Streptococcaceae                 |      |      |      |             |      |       |  |  |  |       |             |      |
| o__Izomoplasmales Order             |      |      |      |             |      |       |  |  |  |       |             |      |
| f__Monoglobaceae                    |      | 0.29 |      |             |      |       |  |  |  |       |             |      |
| o__Clostridia_vadinBB60_group Order |      |      |      |             |      |       |  |  |  |       | <b>0.49</b> |      |
| o__RF39 Order                       |      |      |      |             |      |       |  |  |  |       |             |      |
| c__Clostridia Class                 |      |      |      |             |      |       |  |  |  |       |             |      |
| f__Erysipelotrichaceae              |      |      |      | <b>0.33</b> |      |       |  |  |  | -0.38 | -0.31       |      |
| f__Clostridiaceae                   |      |      |      |             |      |       |  |  |  | -0.31 |             |      |
| f__Butyricicoccaceae                |      |      |      |             | 0.36 |       |  |  |  |       |             |      |
| f__Victivallaceae                   |      |      |      |             |      |       |  |  |  |       |             |      |
| f__UCG-010                          |      |      |      |             |      |       |  |  |  |       |             |      |
| f__Methanobacteriaceae              |      |      |      |             |      | -0.34 |  |  |  |       |             |      |
| f__Eggerthellaceae                  |      |      |      |             |      |       |  |  |  |       |             | 0.36 |
| f__vadinBE97                        |      |      |      |             |      |       |  |  |  |       |             |      |
| f__Anaerovoracaceae                 |      |      |      |             | 0.36 |       |  |  |  |       |             |      |
| f__Lactobacillaceae                 |      |      |      | <b>0.35</b> |      | -0.32 |  |  |  |       | -0.37       |      |
| f__Puniceicoccaceae                 |      |      | 0.28 |             |      |       |  |  |  |       |             |      |

The p-values were false discovery rate (FDR) adjusted. A FDR < 0.15 was considered as statistically significant. The table shows the spearman's rho in bold if FDR < 0.05, in bold italics if FDR > 0.05 but < 0.15 and in normal font if they did not withstand FDR adjustment. Beck Depression Inventory II (BDI-II), Brief Symptom Inventory scale 4 (BSI-D), Brief Symptom Inventory scale 5 (BSI-A), Structured Interview for Anorexic and Bulimic Eating Disorders (SIAB).

**Table S13.** Spearman correlation of additional questionnaires for symptom severity of eating disorder pathology, anxiety, and depression before (T1) and after weight rehabilitation (T2) and their changes during inpatient treatment (longitudinal) with Short Chain Fatty Acids (SCFA).

|             | T1     |       |       |       | T2     |       |       |       | Longitudinal |       |       |       |
|-------------|--------|-------|-------|-------|--------|-------|-------|-------|--------------|-------|-------|-------|
|             | BDI-II | BSI-D | BSI-A | SIAB  | BDI-II | BSI-D | BSI-A | SIAB  | BDI-II       | BSI-D | BSI-A | SIAB  |
| Total SCFA  |        |       |       |       |        |       |       |       |              |       |       | -0.37 |
| Butyrate    |        |       |       |       |        |       |       |       |              |       |       |       |
| Acetate     |        |       |       |       |        |       |       | -0.31 |              |       |       | -0.42 |
| Propionate  |        |       |       |       |        |       |       | -0.32 |              |       |       | -0.41 |
| Valerate    |        |       |       | -0.28 |        |       |       |       |              |       |       |       |
| Isovalerate |        |       |       | -0.32 |        | 0.34  |       |       |              |       |       |       |
| Isobutyrate |        |       |       |       |        |       |       |       |              |       |       |       |

A  $p < 0.05$  was considered as statistically significant. The table shows the spearman's rho if  $p < 0.05$ . Beck Depression Inventory II (BDI-II), Brief Symptom Inventory scale 4 (BSI-D), Brief Symptom Inventory scale 5 (BSI-A), Structured Interview for Anorexic and Bulimic Eating Disorders (SIAB).
